# Supplementary material for: SNP Detection in mRNA in Living Cells Using Allele Specific FRET Probes
Source: PubMed Central journal article supplement (PMC3767744; doi:10.1371/journal.pone.0072389), 2013-09-09
Supplement: pone.0072389.s001.pdf [file pone.0072389.s001.pdf]

|                            |                                                  |                             |         |
|----------------------------|--------------------------------------------------|-----------------------------|---------|
| Target                     | 5' acagcaggucAagaagaguuagugccaugcgggaccaguaca 3' |                             |         |
| Probe and Anchor placement | 3'                                               | CCAGTTCTx xTATCACGGTACGCCCT | 5nt gap |
|                            | 3'                                               | CCAGTTCTx xATATCACGGTACGCC  | 4nt gap |
|                            | 3'                                               | CCAGTTCTx xCATATCACGGTACGCC | 3nt gap |
|                            | 3'                                               | CCAGTTCTxxTCATATCACGGTACGC  | 2nt gap |

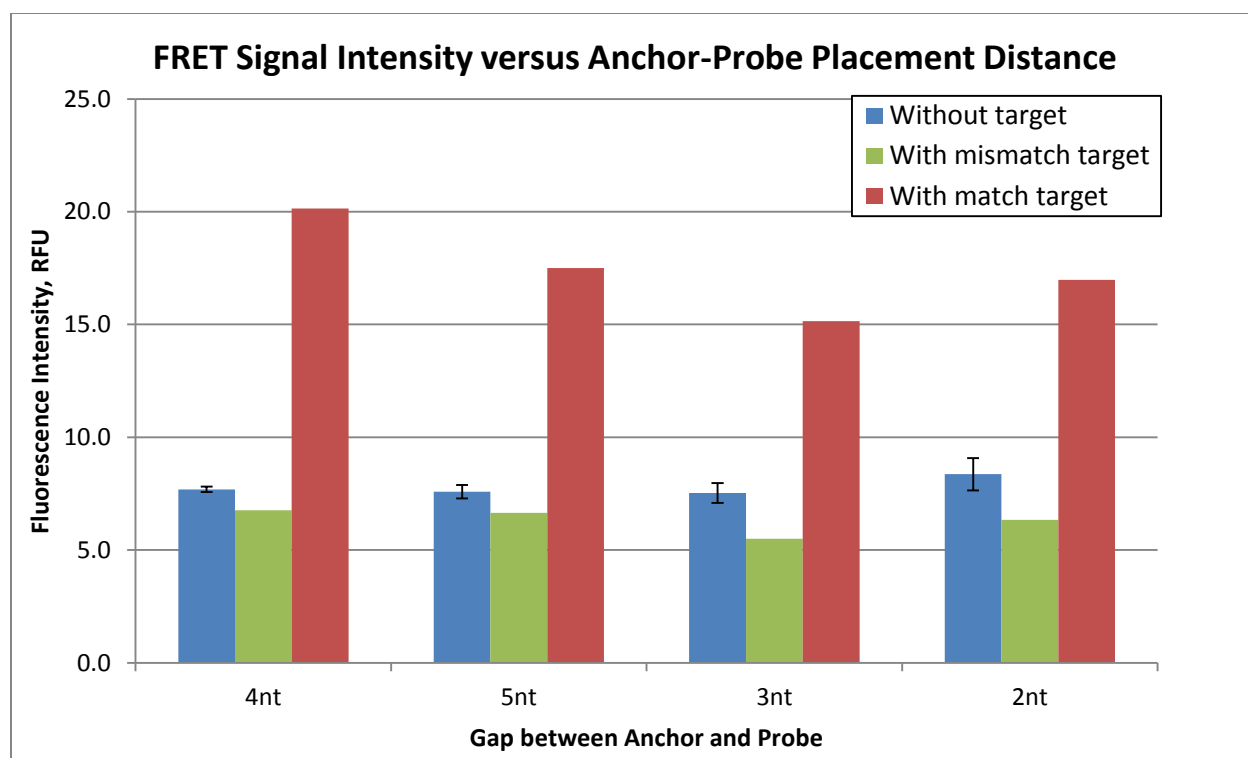

**Figure S1. Optimization between the Anchor (donor) and Probe (acceptor) oligonucleotides. (a):** alignment of the anchor, probe, and target sequences is shown. **(b):** FRET signal intensity comparison with 2, 3, 4, or 5 bases separation between the Anchor and Probe oligonucleotides. The Anchor oligonucleotide is the same as Oligo 1 in Table 1, except that the donor fluorophore is FAM (6-carboxyfluorescein); Probe = Oligo 2, Mismatch target = Oligo 10, and Match target = Oligo 9.
