# Supplementary material for: SNP Detection in mRNA in Living Cells Using Allele Specific FRET Probes
Source: PubMed Central journal article supplement (PMC3767744; doi:10.1371/journal.pone.0072389), 2013-09-09
Supplement: pone.0072389.s002.pdf [file pone.0072389.s002.pdf]

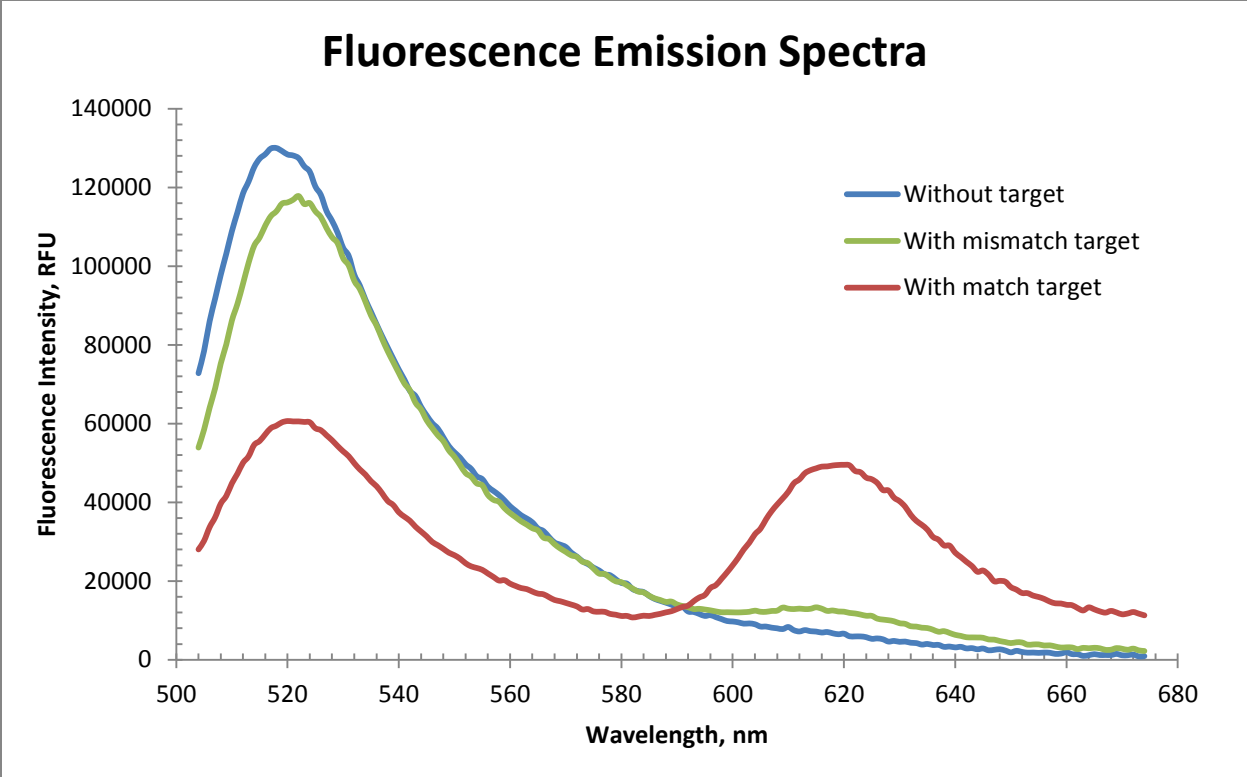

**Figure S2. Fluorescence resonance energy transfer demonstrated by fluorescence emission spectra.**

200 nM anchor (Oligo 1) and T-allele probe (Oligo 2) were incubated and measured at 37°C without target RNA (Blue line), with mismatch target Oligo 10 (Green line), and with match target Oligo 9 (Red line).
